# Supplementary material for: Delineation of musculocontractural Ehlers–Danlos Syndrome caused by dermatan sulfate epimerase deficiency
Source: PubMed Central journal article supplement — Mol Genet Genomic Med. 2020 Mar 4;8(5):e1197. doi: 10.1002/mgg3.1197 (PMC7216804; doi:10.1002/mgg3.1197), 2020-03-04
Supplement: MGG3-8-e1197-s003.pdf [file MGG3-8-e1197-s003.pdf]

**Supplementary Table S2. Filtering steps in the whole exome sequencing on patient 2**

|                                                | Variant number   |
|------------------------------------------------|------------------|
| Total variant (exon +/- 30 bps)                | 5712             |
| Homozygous                                     | 2150             |
| In-house =< 5/575                              | 111              |
| ExAC =< 0.005                                  | 60               |
| ESP6500 = < 0.005                              | 59               |
| HGVD =< 0.005                                  | 59               |
| Remove synonymous                              | 44               |
| Know disease gene match to patient's phenotype | 1 ( <i>DSE</i> ) |

Footnote: The common SNP (MAF > 1%) has been already removed in our pipeline.
